# Supplementary material for: Assessment of lung hyperinflation in occupational chronic obstructive pulmonary disease: a multicentric cross-sectional study
Source: HighWire-hosted journal article supplement (doi:10.1136/bmjresp-2023-001846), 2023-09-01
Supplement: bmjresp-2023-001846supp002_data_supplement.pdf [file bmjresp-2023-001846supp002_data_supplement.pdf]

Appendix 2 :  
**Questionnaire professionnel  
BPROFETIO**

Centre participant :

- 1 Besançon     2 Bordeaux   
3 Caen     4 Créteil   
5 Le Havre     6 Lille   
7 Nancy

**Numéro d'inclusion du sujet :** | \_ | | \_ | | \_ | | \_ | | \_ | | \_ | |

**Type de cas (une seule case à cocher) :**

- prévalent   
- incident pour le centre  (BPCO suivie antérieurement à l'extérieur du centre)  
- incident « vrai »  (sans diagnostic de BPCO antérieurement)

**Nom :** \_\_\_\_\_

**Prénom :** \_\_\_\_\_

**Sexe (entourer) :**    M    F

**Date de naissance :** \_\_\_\_ / \_\_\_\_ / \_\_\_\_

**N° sécurité sociale :** \_\_\_\_\_ / \_\_\_\_\_

## Questionnaire professionnel BPROFETIO

Centre participant :

- 1 Besançon     2 Bordeaux   
 3 Caen     4 Créteil   
 5 Le Havre     6 Lille   
 7 Nancy

Numéro d'inclusion du sujet : | | | | | | | | | | | | | | | | | |

Médecin demandeur : \_\_\_\_\_ Date de la consultation : \_ / \_ / \_ \_  
 Première consultation                    oui           non  
 Suivi dans le service                    oui           non  
 EFR dans le dossier                    oui           non  
 Prochaine consultation prévue           oui           non           Si oui, date prévue : \_ / \_ / \_ \_

Type de cas (une seule case à cocher):  
 - Prévalent   
 - Incident pour le centre  (BPCO suivie antérieurement à l'extérieur du centre)  
 - Incident « vrai »  (sans diagnostic de BPCO antérieurement)

Nom : \_\_\_\_\_  
 Nom de jeune fille : \_\_\_\_\_  
 Prénom : \_\_\_\_\_  
 Date de naissance : \_ / \_ / \_ \_  
 Sexe : Femme  Homme

Adresse postale : \_\_\_\_\_  
 \_\_\_\_\_  
 \_\_\_\_\_  
 \_\_\_\_\_  
 Téléphone : \_ \_ - \_ \_ - \_ \_ - \_ \_

**CRITERES D'ELIGIBILITE**

- Masculin ou féminin,
- Agé entre 40 et 80 ans,
- Suivis en consultation de pneumologie, de pathologie professionnelle, de tabacologie et de réhabilitation respiratoire ou dans le service d'explorations fonctionnelles respiratoires du centre hospitalier.
- Critère GOLD ≥ Stade I
- Diagnostic clinique de BPCO confirmé par le médecin,
- Pas de dilatation des bronches diagnostiquée avant 40 ans, bronchectasies
- Pas de déficit en  $\alpha$ 1-antitrypsine et/ou Asthme ou ATCD d'asthme (en dehors de l'asthme de l'enfance sans traitement par bronchodilatateur et sans signes cliniques à l'âge adulte (> 18 ans).

**EXPLORATIONS FONCTIONNELLES RESPIRATOIRES**

Date : \_\_\_ / \_\_\_ / \_\_\_

Réalisation: Dans le centre participant  Hors du dans le centre participant Technique employée : Pléthysmographie  Spirométrie Ethnie : Europe  Afrique du Nord  Afrique noire  Asie  Moyen-orient 

VEMS : \_\_\_ , \_\_\_ L

CVF : \_\_\_ , \_\_\_ L VEMS/CVF : \_\_\_ , \_\_\_ %

CVL : \_\_\_ , \_\_\_ L VEMS/CVL : \_\_\_ , \_\_\_ %

VEMS post-bronchodilatation : \_\_\_ , \_\_\_ L + \_\_\_ , \_\_\_ %

Rappel : TVO non réversible si : gain inférieur à 200 mL du VEMS et augmentation du VEMS inférieure à 12% après bronchodilatation (critères GOLD)

Prise d'un traitement pneumologique la veille des EFR : Oui  Non  NSP   
si oui, le(s)quel(s) : .....Prise d'un traitement pneumologique le jour des EFR : Oui  Non  NSP   
si oui, le(s)quel(s) : .....Diagnostic d'asthme dans l'enfance : Oui  Non  NSP Diagnostic d'asthme à l'âge adulte traité : Oui  Non  NSP **EXAMEN CLINIQUE**

Date : \_\_\_ / \_\_\_ / \_\_\_

Toux : présente  absente  Expectorations : présentes  absentes Echelle MMRC : Dyspnée :  Stade 0 : Essoufflé seulement pour des efforts intenses  
 Stade 1 : Essoufflé en montant le pas ou en montant une légère côte  
 Stade 2 : la marche sur terrain plat se fait plus lentement que les sujets de son âge, ou doit s'arrêter en marchant à son rythme sur terrain plat  
 Stade 3 : doit s'arrêter après 100m ou quelques minutes de marche  
 Stade 4 : trop essoufflé pour sortir de la maison

**CRITERES D'ELIGIBILITE**

- Masculin ou féminin,
- Agé entre 40 et 80 ans,
- Suivis en consultation de pneumologie, de pathologie professionnelle, de tabacologie et de réhabilitation respiratoire ou dans le service d'explorations fonctionnelles respiratoires du centre hospitalier.
- Critère GOLD ≥ Stade I
- Diagnostic clinique de BPCO confirmé par le médecin,
- Pas de dilatation des bronches diagnostiquée avant 40 ans, bronchectasies
- Pas de déficit en  $\alpha$ 1-antitrypsine et/ou Asthme ou ATCD d'asthme (en dehors de l'asthme de l'enfance sans traitement par bronchodilatateur et sans signes cliniques à l'âge adulte (> 18 ans).

**EXPLORATIONS FONCTIONNELLES RESPIRATOIRES**

Date : \_\_\_ / \_\_\_ / \_\_\_

Réalisation: Dans le centre participant  Hors du dans le centre participant Technique employée: Pléthysmographie  Spirométrie Ethnie : Europe  Afrique du Nord  Afrique noire  Asie  Moyen-orient 

VEMS : \_\_\_ , \_\_\_ L

CVF : \_\_\_ , \_\_\_ L VEMS/CVF : \_\_\_ , \_\_\_ %

CVL : \_\_\_ , \_\_\_ L VEMS/CVL : \_\_\_ , \_\_\_ %

VEMS post-bronchodilatation : \_\_\_ , \_\_\_ L + \_\_\_ , \_\_\_ %

Rappel : TVO non réversible si : gain inférieur à 200 mL du VEMS et augmentation du VEMS inférieure à 12% après bronchodilatation (critères GOLD)

Prise d'un traitement pneumologique la veille des EFR : Oui  Non  NSP   
si oui, le(s)quel(s) : .....Prise d'un traitement pneumologique le jour des EFR : Oui  Non  NSP   
si oui, le(s)quel(s) : .....Diagnostic d'asthme dans l'enfance : Oui  Non  NSP Diagnostic d'asthme à l'âge adulte traité : Oui  Non  NSP **EXAMEN CLINIQUE**

Date : \_\_\_ / \_\_\_ / \_\_\_

Toux : présente  absente  Expectations : présentes  absentes Echelle MMRC : Dyspnée :  Stade 0 : Essoufflé seulement pour des efforts intenses  
 Stade 1 : Essoufflé en hâtant le pas ou en montant une légère côte  
 Stade 2 : la marche sur terrain plat se fait plus lentement que les sujets de son âge, ou doit s'arrêter en marchant à son rythme sur terrain plat  
 Stade 3 : doit s'arrêter après 100m ou quelques minutes de marche  
 Stade 4 : trop essoufflé pour sortir de la maison

**ENTRETIEN**

Date : \_\_\_/\_\_\_/\_\_\_

Nom et adresse du médecin traitant : Dr \_\_\_\_\_

Coopération du patient : Bonne  Moyenne  Médiocre **TABAGISME****Classe de tabagisme :**Non fumeur  Fumeur  Ex-fumeur (arrêt >1 an) 

Durée : Année de début : \_\_\_ Année d'arrêt : \_\_\_

Cigarettes (nombre par jour) :

• de 19 \_\_\_ à 19 \_\_\_ : \_\_\_ /jour

• de 19 \_\_\_ à 19 \_\_\_ : \_\_\_ /jour

• de 19 \_\_\_ à 19 \_\_\_ : \_\_\_ /jour

• de 19 \_\_\_ à 19 \_\_\_ : \_\_\_ /jour

• de 19 \_\_\_ à 19 \_\_\_ : \_\_\_ /jour

• de 19 \_\_\_ à 19 \_\_\_ : \_\_\_ /jour

Cigares (nombre par jour) :

• de 19 \_\_\_ à 19 \_\_\_ : \_\_\_ /jour

• de 19 \_\_\_ à 19 \_\_\_ : \_\_\_ /jour

• de 19 \_\_\_ à 19 \_\_\_ : \_\_\_ /jour

• de 19 \_\_\_ à 19 \_\_\_ : \_\_\_ /jour

Pipe : Poids d'un paquet en gramme : \_\_\_ g

Nombre de paquets par mois : \_\_\_ / mois

• de 19 \_\_\_ à 19 \_\_\_ : \_\_\_ p/mois

• de 19 \_\_\_ à 19 \_\_\_ : \_\_\_ p/mois

• de 19 \_\_\_ à 19 \_\_\_ : \_\_\_ p/mois

• de 19 \_\_\_ à 19 \_\_\_ : \_\_\_ p/mois

Durée totale du tabagisme (en années) :

\_\_\_ ans

Tabagisme cumulé (paquets-années) :

\_\_\_ P-A

Tabagisme passif seulement si non fumeur ou fumeur/ex-fumeur (&lt; 5 PA) :

Oui Non 

- Conjoint fumeur : \_\_\_ ans (durée cumulée)
- Collègues fumeurs sur le lieu de travail : \_\_\_ ans (durée cumulée)
- Parents fumeurs au domicile au cours de l'enfance : \_\_\_ ans (durée cumulée)

Oui Non 

Ne pas remplir cette colonne

**A titre Indicatif :**

Poids de tabac dans :

Cigarette :

- 0,8 g Jusqu'en 1958

- 1 g de 1958 à 1980

- 0,8 g depuis 1980

Cigarillo : 1,6 g

Cigare : 4 g

**SCOLARISATION ET FORMATION PROFESSIONNELLE**Ne pas remplir cette colonne  
Ne pas remplir cette colonne

- A quel âge avez-vous quitté l'enseignement général ? \_\_\_\_ ans

- Quel niveau d'étude avez-vous atteint ?

Non scolarisé  Ecole primaire   
 Collège  Lycée   
 Enseignement Supérieur

- Avez-vous effectué une ou des périodes de formation professionnelle ?

Oui  Non

Si oui, précisez la période de formation et le niveau obtenu :

De \_\_\_\_ à \_\_\_\_ Niveau : \_\_\_\_\_  
 De \_\_\_\_ à \_\_\_\_ Niveau : \_\_\_\_\_

\*\*\* **Important** \*\*\*: Ne pas oublier de remplir une page d'activité professionnelle pour chaque période citée.

- Avez-vous effectué une période d'activité militaire ?

Oui  Non

Précisez la période du service national : De \_\_\_\_ à \_\_\_\_

\*\*\* **Important** \*\*\*: Ne pas oublier de remplir une page d'activité professionnelle pour le service militaire).

**ACTIVITE PROFESSIONNELLE N°1**

Ne pas remplir cette colonne

**Année de début :** \_\_\_\_\_ **Année de fin :** \_\_\_\_\_

□□/□□

**Nom et adresse de l'entreprise :** \_\_\_\_\_

**Code NAF 93**  
□□□□

\_\_\_\_\_

**Code NAF 2008**  
□□□□□□

\_\_\_\_\_

**Activité principale de l'entreprise :** \_\_\_\_\_

\_\_\_\_\_

\_\_\_\_\_

\_\_\_\_\_

\_\_\_\_\_

**Code BIT 88**

□□□□

\_\_\_\_\_

**Code BIT 2008**  
□□□□□□

\_\_\_\_\_

**Quelle était votre métier :** \_\_\_\_\_

**Temps de travail :** \_\_\_\_\_ **Partiel :** \_\_\_\_\_ **heures/ semaine** **Plein temps**

**Description du poste de travail**

**Locaux :**

**Machines :**

**Procédés :**

**Matériaux :**

**Produits utilisés (marques) :**

**Existait-il au poste de travail :** Poussières Fumées Gaz Vapeurs

Si oui lesquels :

**Protection Individuelles ou collective ?**

|          |          |             |            |
|----------|----------|-------------|------------|
| Cabine   | Capotage | Ventilation | Aspiration |
| Lunettes | Gants    | Masques     | Vêtements  |

**Quels travaux effectuaient les collègues autour de votre poste de travail ?**

**Avez-vous déjà remplacé un collègue, si oui pour quelle tâche et pendant combien de temps ?**

## Production laitière

(exploitant ou salarié, y compris aide familial bénévole dans l'enfance ou en période de retraite)

N° \_\_\_ Emploi De \_\_\_ à \_\_\_  
 N° \_\_\_ Emploi De \_\_\_ à \_\_\_  
 N° \_\_\_ Emploi De \_\_\_ à \_\_\_  
 N° \_\_\_ Emploi De \_\_\_ à \_\_\_

\* Estimation de la fréquence : 1 = Sporadique < 2 h/sem ; 2 = Discontinue 2 à 20 h/sem ; 3 = Continue > 20 h/sem

### 1. Travaux effectués personnellement

| Poste(s) occupé(s)                                         | Activité                                                  |                                                                           | Période (début/fin)<br>(en années) | Fréquence * | Durée cumulée<br>(ans) |
|------------------------------------------------------------|-----------------------------------------------------------|---------------------------------------------------------------------------|------------------------------------|-------------|------------------------|
|                                                            | <input type="checkbox"/> oui <input type="checkbox"/> non | actuelle <input type="checkbox"/><br>interrompue <input type="checkbox"/> |                                    |             |                        |
| Traite en étable                                           | <input type="checkbox"/> oui <input type="checkbox"/> non | actuelle <input type="checkbox"/><br>interrompue <input type="checkbox"/> | ___/___/___                        | ___ %       | ___                    |
| Traite en salle de traite                                  | <input type="checkbox"/> oui <input type="checkbox"/> non | actuelle <input type="checkbox"/><br>interrompue <input type="checkbox"/> | ___/___/___                        | ___ %       | ___                    |
| Affouragement manuel                                       | <input type="checkbox"/> oui <input type="checkbox"/> non | actuelle <input type="checkbox"/><br>interrompue <input type="checkbox"/> | ___/___/___                        | ___ %       | ___                    |
| Affouragement mécanisé                                     | <input type="checkbox"/> oui <input type="checkbox"/> non | actuelle <input type="checkbox"/><br>interrompue <input type="checkbox"/> | ___/___/___                        | ___ %       | ___                    |
| Renouvellement de la litière des animaux manuel            | <input type="checkbox"/> oui <input type="checkbox"/> non | actuelle <input type="checkbox"/><br>interrompue <input type="checkbox"/> | ___/___/___                        | ___ %       | ___                    |
| Renouvellement de la litière des animaux mécanisé          | <input type="checkbox"/> oui <input type="checkbox"/> non | actuelle <input type="checkbox"/><br>interrompue <input type="checkbox"/> | ___/___/___                        | ___ %       | ___                    |
| Préparation et distribution des compléments d'alimentation | <input type="checkbox"/> oui <input type="checkbox"/> non | actuelle <input type="checkbox"/><br>interrompue <input type="checkbox"/> | ___/___/___                        | ___ %       | ___                    |

### 2. Hivernage : Durée annuelle moyenne : \_\_\_ mois Temps passé dans les bâtiments agricoles ? \_\_\_ H/jour

### 3. Caractéristiques de l'exploitation

- Le bâtiment d'habitation est (était) t-il séparé des bâtiments de l'exploitation ?  
 Si oui, à partir de quelle année : \_\_\_\_\_ Distance séparant les bâtiments : \_\_\_\_\_ en mètres  
 oui  non  depuis l'année: \_\_\_\_\_ oui  non
- Disposez-vous des équipements ou aménagements suivants :
  - Stabulation libre : oui  non  depuis l'année: \_\_\_\_\_
  - Griffe de chargement oui  non  depuis l'année: \_\_\_\_\_
  - Pailleuse oui  non  depuis l'année: \_\_\_\_\_
  - Salle de traite oui  non  depuis l'année: \_\_\_\_\_
  - Séchage artificiel du fourrage en grange oui  non  depuis l'année: \_\_\_\_\_
  - Ventilation électrique de la grange oui  non  depuis l'année: \_\_\_\_\_
  - Ventilation électrique de l'étable oui  non  depuis l'année: \_\_\_\_\_
- Mode de conditionnement des fourrages :
  - Fourrage stocké en vrac oui  non  Période: \_\_\_\_\_
  - Balles de moyenne densité oui  non  Période: \_\_\_\_\_
  - Grosses balles de haute densité (rondes/rectangulaires) oui  non  Période: \_\_\_\_\_

### 4. Avez-vous effectué d'autre(s) tâche(s) ?

Si oui, lesquelles ? ..... Oui  Non  H/Sem \_\_\_\_\_ ans

### 5. Commentaires libres



### Activités de culture (y compris en coopératives)

N° \_\_\_\_\_ Emploi De \_\_\_\_\_ à \_\_\_\_\_  
 N° \_\_\_\_\_ Emploi De \_\_\_\_\_ à \_\_\_\_\_  
 N° \_\_\_\_\_ Emploi De \_\_\_\_\_ à \_\_\_\_\_  
 N° \_\_\_\_\_ Emploi De \_\_\_\_\_ à \_\_\_\_\_

\* Estimation de la fréquence : 1 = Sporadique < 2 h/sem ; 2 = Discontinue 2 à 20 h/sem ; 3 = Continue > 20 h/sem

|                                                                          | Fréquence*                   |                              | Durée cumulée                                           |                                                    |
|--------------------------------------------------------------------------|------------------------------|------------------------------|---------------------------------------------------------|----------------------------------------------------|
| <b>1. Y avait-t-il des culture(s) dans votre exploitation ?</b>          | Oui <input type="checkbox"/> | Non <input type="checkbox"/> | Si oui, quel(s) type(s) (entourer le nombre d'hectares) |                                                    |
| - Blé                                                                    | Oui <input type="checkbox"/> | Non <input type="checkbox"/> | NSP <input type="checkbox"/>                            | < 30    30 à 70    > 70    Hectares    _____ ans   |
| - Orge                                                                   | Oui <input type="checkbox"/> | Non <input type="checkbox"/> | NSP <input type="checkbox"/>                            | < 10    10 à 30    > 30    Hectares    _____ ans   |
| - Maïs (fourrage, grains, semences)                                      | Oui <input type="checkbox"/> | Non <input type="checkbox"/> | NSP <input type="checkbox"/>                            | < 10    10 à 30    > 30    Hectares    _____ ans   |
| - Autres céréales (seigle, avoine...)                                    | Oui <input type="checkbox"/> | Non <input type="checkbox"/> | NSP <input type="checkbox"/>                            | < 10    10 à 30    > 30    Hectares    _____ ans   |
| - Bétaïves                                                               | Oui <input type="checkbox"/> | Non <input type="checkbox"/> | NSP <input type="checkbox"/>                            | < 20    20 à 50    > 50    Hectares    _____ ans   |
| - Oléagineux (colza, tournesol...)                                       | Oui <input type="checkbox"/> | Non <input type="checkbox"/> | NSP <input type="checkbox"/>                            | < 20    20 à 50    > 50    Hectares    _____ ans   |
| - Fourrage                                                               | Oui <input type="checkbox"/> | Non <input type="checkbox"/> | NSP <input type="checkbox"/>                            | < 30    30 à 70    > 70    Hectares    _____ ans   |
| - Fibres végétales (coton, jute...)                                      | Oui <input type="checkbox"/> | Non <input type="checkbox"/> | NSP <input type="checkbox"/>                            | < 10    10 à 30    > 30    Hectares    _____ ans   |
| - Légumes                                                                | Oui <input type="checkbox"/> | Non <input type="checkbox"/> | NSP <input type="checkbox"/>                            | < 5    5 à 20    > 20    Hectares    _____ ans     |
| - Pommes de terre                                                        | Oui <input type="checkbox"/> | Non <input type="checkbox"/> | NSP <input type="checkbox"/>                            | < 5    5 à 20    > 20    Hectares    _____ ans     |
| - Fruits                                                                 | Oui <input type="checkbox"/> | Non <input type="checkbox"/> | NSP <input type="checkbox"/>                            | < 5    5 à 20    > 20    Hectares    _____ ans     |
| - Vignes                                                                 | Oui <input type="checkbox"/> | Non <input type="checkbox"/> | NSP <input type="checkbox"/>                            | < 5    5 à 20    > 20    Hectares    _____ ans     |
| <b>Si oui, remplir une fiche « Industrie textile »</b>                   |                              |                              |                                                         |                                                    |
| - Autres (à préciser) <input type="checkbox"/>                           | Lesquels ? .....             |                              | < 10    10 à 50    > 50    Hectares    _____ ans        |                                                    |
| <b>2. Quel(s) type(s) de céréale(s) y avait dans les silos à grain ?</b> | Oui <input type="checkbox"/> | Non <input type="checkbox"/> | Si oui, quel type ? (entourer la capacité des silos)    |                                                    |
| - Avoine                                                                 | Oui <input type="checkbox"/> | Non <input type="checkbox"/> | NSP <input type="checkbox"/>                            | < 10    10 à 1000    > 1000    tonnes    _____ ans |
| - Blé                                                                    | Oui <input type="checkbox"/> | Non <input type="checkbox"/> | NSP <input type="checkbox"/>                            | < 10    10 à 1000    > 1000    tonnes    _____ ans |
| - Colza                                                                  | Oui <input type="checkbox"/> | Non <input type="checkbox"/> | NSP <input type="checkbox"/>                            | < 10    10 à 1000    > 1000    tonnes    _____ ans |
| - Orge                                                                   | Oui <input type="checkbox"/> | Non <input type="checkbox"/> | NSP <input type="checkbox"/>                            | < 10    10 à 1000    > 1000    tonnes    _____ ans |
| - Maïs                                                                   | Oui <input type="checkbox"/> | Non <input type="checkbox"/> | NSP <input type="checkbox"/>                            | < 10    10 à 1000    > 1000    tonnes    _____ ans |
| - Tournesol                                                              | Oui <input type="checkbox"/> | Non <input type="checkbox"/> | NSP <input type="checkbox"/>                            | < 10    10 à 1000    > 1000    tonnes    _____ ans |
| - Seigle                                                                 | Oui <input type="checkbox"/> | Non <input type="checkbox"/> | NSP <input type="checkbox"/>                            | < 10    10 à 1000    > 1000    tonnes    _____ ans |
| - Pois                                                                   | Oui <input type="checkbox"/> | Non <input type="checkbox"/> | NSP <input type="checkbox"/>                            | < 10    10 à 1000    > 1000    tonnes    _____ ans |
| - Autres (à préciser) <input type="checkbox"/>                           | Lesquels ? .....             |                              | < 10    10 à 1000    > 1000    tonnes    _____ ans      |                                                    |
| <b>3. Avez-vous effectué d'autres tâches ?</b>                           | Oui <input type="checkbox"/> | Non <input type="checkbox"/> |                                                         |                                                    |
| Si oui, lesquelles ? .....                                               |                              |                              |                                                         |                                                    |
| <b>4. Commentaires libres</b>                                            |                              |                              |                                                         |                                                    |

## Activités d'élevage (y compris en abattoir et en industrie)

N° \_\_\_ Emploi De \_\_\_ à \_\_\_  
 N° \_\_\_ Emploi De \_\_\_ à \_\_\_  
 N° \_\_\_ Emploi De \_\_\_ à \_\_\_  
 N° \_\_\_ Emploi De \_\_\_ à \_\_\_

\* Estimation de la fréquence : 1 = Sporadique < 2 h/sem ; 2 = Discontinue 2 à 20 h/sem ; 3 = Continue > 20 h/sem

Fréquence\* Durée cumulée

### 1. Avez-vous effectué de l'élevage d'animaux dans l'exploitation ?

Si Oui, quel(s) type(s) ?

|                                                                 | Oui <input type="checkbox"/>                                                                                                  | Non <input type="checkbox"/> |
|-----------------------------------------------------------------|-------------------------------------------------------------------------------------------------------------------------------|------------------------------|
| - Bovins (bœufs/vaches/veaux)                                   | Oui <input type="checkbox"/> Non <input type="checkbox"/> Confinement <input type="checkbox"/> < 50 50 à 100 >100 têtes       | ___ ans                      |
| - Ovins (moutons/agneaux/brebis)                                | Oui <input type="checkbox"/> Non <input type="checkbox"/> Confinement <input type="checkbox"/> < 50 50 à 100 >100 têtes       | ___ ans                      |
| - Caprins (chèvres/cabris...)                                   | Oui <input type="checkbox"/> Non <input type="checkbox"/> Confinement <input type="checkbox"/> < 50 50 à 100 >100 têtes       | ___ ans                      |
| - Porcs                                                         | Oui <input type="checkbox"/> Non <input type="checkbox"/> Confinement <input type="checkbox"/> < 50 50 à 100 >100 têtes       | ___ ans                      |
| - Volailles                                                     | Oui <input type="checkbox"/> Non <input type="checkbox"/> Confinement <input type="checkbox"/> < 100 100 à 1.000 >1.000 têtes | ___ ans                      |
| - Autres (à préciser) <input type="checkbox"/> Lesquels ? ..... | Confinement <input type="checkbox"/> < 50 50 à 100 >100 têtes                                                                 | ___ ans                      |

(Entourer le nombre de têtes)

### 2. Vous occup(é)ez-vous de :

- Affouragement manuel Oui  Non  NSP  \_\_\_ ans  
 - Affouragement mécanisé Oui  Non  NSP  \_\_\_ ans  
 - Désinfection des locaux et du matériel Oui  Non  NSP  \_\_\_ ans  
 - Désinfection/parasitage des animaux Oui  Non  NSP  \_\_\_ ans  
 - Renouvellement mécanique de la litière des animaux Oui  Non  NSP  \_\_\_ ans  
 - Renouvellement manuel de la litière des animaux Oui  Non  NSP  \_\_\_ ans  
 - Préparation/distribution des compléments d'alimentation Oui  Non  NSP  \_\_\_ ans  
 - Traitement d'animaux : Lesquels ? ..... Oui  Non  **Si Oui, remplir fiche « production laitière »**  
 - Autres (à préciser)  Lesquels ? ..... \_\_\_ ans

### 3. Hivernage : Durée annuelle moyenne : \_\_, \_\_ mois Temps passé dans les bâtiments agricoles : \_\_\_ H/ jour

### 4. Caractéristiques de l'exploitation :

Le bâtiment d'habitation est (était) t-l séparé des bâtiments de l'exploitation ? Oui  Non

Si Oui, à partir de quelle année : \_\_\_\_\_ Distance séparant les bâtiments : \_\_\_\_\_ en mètres

### 5. Disposit(é)ez-vous des équipements ou aménagements suivants :

Stabulation libre : Oui  Non  depuis l'année: \_\_\_\_\_  
 Griffe de chargement Oui  Non  depuis l'année: \_\_\_\_\_  
 Pailleuse Oui  Non  depuis l'année: \_\_\_\_\_  
 Salle de traite Oui  Non  depuis l'année: \_\_\_\_\_ **Si Oui, remplir fiche « production laitière »**  
 Séchage artificiel du fourrage en grange Oui  Non  depuis l'année: \_\_\_\_\_  
 Ventilation électrique de la grange Oui  Non  depuis l'année: \_\_\_\_\_  
 Ventilation électrique de l'étable Oui  Non  depuis l'année: \_\_\_\_\_

**6. Mode de conditionnement des fourrages :**Fourrage stocké en vrac  Oui  Non  Période: \_\_\_\_/\_\_\_\_/\_\_\_\_Balles de moyenne densité  Oui  Non  Période: \_\_\_\_/\_\_\_\_/\_\_\_\_Grosses balles de haute densité (rondes/rectangulaires)  Oui  Non  Période: \_\_\_\_/\_\_\_\_/\_\_\_\_**7. Falsiez-vous de l'abatage de bétail ?**Si Oui, découpiez-vous et préparez-vous les bêtes?  Oui  Non  Non  Non  Non

(Entourer le nombre de têtes/an)

- Bovins  Oui  Non  NSP  < 10  10 à 1000  > 1000 têtes/an \_\_\_\_ ans- Ovins  Oui  Non  NSP  < 10  10 à 1000  > 1000 têtes/an \_\_\_\_ ans- Caprins  Oui  Non  NSP  < 10  10 à 1000  > 1000 têtes/an \_\_\_\_ ans- Porcs  Oui  Non  NSP  < 10  10 à 1000  > 1000 têtes/an \_\_\_\_ ans- Volailles  Oui  Non  NSP  < 10  10 à 1000  > 1000 têtes/an \_\_\_\_ ans- Autres (à préciser)  Lesquels ? ..... < 10  10 à 1000  > 1000 têtes/an \_\_\_\_ ans**8. Avez-vous effectué d'autre(s) tâche(s) ?**Si Oui, lesquelles ? .....  Oui  Non  Non  Non \_\_\_\_ ans**9. Commentaires libres**

## POUSSIÈRES DE BOIS

N° \_\_\_ Emploi De \_\_\_ à \_\_\_  
 N° \_\_\_ Emploi De \_\_\_ à \_\_\_  
 N° \_\_\_ Emploi De \_\_\_ à \_\_\_  
 N° \_\_\_ Emploi De \_\_\_ à \_\_\_

\* Estimation de la fréquence : 1 = Sporadique < 2 h/sem ; 2 = Discontinue 2 à 20 h/sem ; 3 = Continue > 20 h/sem

|                                                                                                                                                                                       | Fréquence*                                                                | Durée cumulée                                             |
|---------------------------------------------------------------------------------------------------------------------------------------------------------------------------------------|---------------------------------------------------------------------------|-----------------------------------------------------------|
| <b>1. Durée quotidienne de l'activité: ___ h/jour</b>                                                                                                                                 |                                                                           |                                                           |
| <b>2. Quel(s) type(s) de bois êtes-vous exposé ?</b>                                                                                                                                  |                                                                           |                                                           |
| Bois durs <input type="checkbox"/> Bois tendres <input type="checkbox"/> Bois exotiques <input type="checkbox"/>                                                                      |                                                                           |                                                           |
| <b>3. Avez-vous traité du bois (créosotes, goudrons, xyloprotecteurs, traitement CCA, processus COBRA, ...)?</b>                                                                      | Oui <input type="checkbox"/> Non <input type="checkbox"/>                 | ___ ans                                                   |
| Si oui, quels type(s) d'application(s) avez-vous utilisée(s)                                                                                                                          |                                                                           |                                                           |
| Etuve <input type="checkbox"/> Bain <input type="checkbox"/> Pulvérisation <input type="checkbox"/> Routeau/pinceau <input type="checkbox"/> Injection <input type="checkbox"/>       |                                                                           |                                                           |
| <b>4. Avez-vous nettoyé/décapé ou préparé du bois ?</b>                                                                                                                               | Oui <input type="checkbox"/> Non <input type="checkbox"/>                 | ___ ans                                                   |
| Si oui, quels type(s)                                                                                                                                                                 |                                                                           |                                                           |
| Chimique : Cautiques ou alcalins (soude, potasse, ammoniac...) <input type="checkbox"/>                                                                                               |                                                                           |                                                           |
| Acides <input type="checkbox"/>                                                                                                                                                       |                                                                           |                                                           |
| Décapants <input type="checkbox"/>                                                                                                                                                    |                                                                           |                                                           |
| Agents blanchissants (eau oxygénée...) <input type="checkbox"/>                                                                                                                       |                                                                           |                                                           |
| Thermique : Bridage à la torche/ chalumeau de peinture ancienne <input type="checkbox"/>                                                                                              |                                                                           |                                                           |
| <b>5. Avez-vous utilisé des colles ou adhésifs ?</b>                                                                                                                                  |                                                                           |                                                           |
| Si oui, quels type(s) : Colle blanche <input type="checkbox"/> Colles phénol-formol <input type="checkbox"/> Colle néoprène <input type="checkbox"/>                                  | Oui <input type="checkbox"/> Non <input type="checkbox"/>                 | ___ ans                                                   |
| Colle mélamine- urée-formo <input type="checkbox"/> Colle cellulosique <input type="checkbox"/>                                                                                       |                                                                           |                                                           |
| <b>6. Avez-vous peint verni et/ou vitrifié du bois ?</b>                                                                                                                              | Oui <input type="checkbox"/> Non <input type="checkbox"/>                 | ___ ans                                                   |
| Si oui, quels type(s) : Cellulosiques <input type="checkbox"/> Phénol-formol <input type="checkbox"/> Urée-formol <input type="checkbox"/> Glycérophalliques <input type="checkbox"/> |                                                                           |                                                           |
| Vinyliques <input type="checkbox"/> Acrylique <input type="checkbox"/> Huile de lin <input type="checkbox"/>                                                                          |                                                                           |                                                           |
| <b>7. Avez-vous utilisé des solvants organiques/diluants/dégraissants ?</b>                                                                                                           | Oui <input type="checkbox"/> Non <input type="checkbox"/>                 | ___ ans                                                   |
| Si oui, quels type(s) : White spirit <input type="checkbox"/> Essence <input type="checkbox"/> Gasoil <input type="checkbox"/>                                                        |                                                                           |                                                           |
| Alcool éthylique <input type="checkbox"/> Essence de térébenthine <input type="checkbox"/> Trichloréthylène <input type="checkbox"/>                                                  |                                                                           |                                                           |
| <b>8. Avez-vous eu à disposition des moyens de protection individuel</b>                                                                                                              | Oui <input type="checkbox"/> Non <input type="checkbox"/> et/ou collectif | Oui <input type="checkbox"/> Non <input type="checkbox"/> |
| Si oui, quels type(s) : Masque à poussière <input type="checkbox"/> Cabine de peinture <input type="checkbox"/> Ventilation au poste de travail <input type="checkbox"/>              |                                                                           |                                                           |
| Ventilation générale <input type="checkbox"/> Aspirateur/sac à poussière <input type="checkbox"/>                                                                                     |                                                                           |                                                           |
| <b>9. Avez-vous fait d'autre(s) tâche(s) exposant aux poussières de bois ?</b>                                                                                                        | Oui <input type="checkbox"/> Non <input type="checkbox"/>                 | ___ ans                                                   |
| Si oui, lesquelles ? .....                                                                                                                                                            |                                                                           |                                                           |
| <b>10. Commentaires libres</b>                                                                                                                                                        |                                                                           |                                                           |

## METIERS DU BTP

N° \_\_\_ Emploi De \_\_\_ à \_\_\_  
 N° \_\_\_ Emploi De \_\_\_ à \_\_\_  
 N° \_\_\_ Emploi De \_\_\_ à \_\_\_  
 N° \_\_\_ Emploi De \_\_\_ à \_\_\_

\* Estimation de la fréquence : 1 = Sporadique < 2 h/sem ; 2 = discontinue 2 à 20 h/sem ; 3 = continue > 20 h/sem

Fréquence\* Durée cumulée

### 1. Sur quel type de bâtiment avez-vous travaillé ?

Constructions individuelles Oui  Non  NSP  \_\_\_ ans  
 Immeubles collectifs (habitation ou bureaux) Oui  Non  NSP  \_\_\_ ans  
 Bâtiments publics (Écoles, hôpitaux, gymnases...) Oui  Non  NSP  \_\_\_ ans  
 Bâtiments à usage professionnel (hors bureaux) Oui  Non  NSP  \_\_\_ ans  
 Autres types (à préciser) ..... Oui  Non  NSP  \_\_\_ ans

### 2. Avez-vous travaillé sur des chantiers ?

De rénovation Oui  Non  NSP  \_\_\_ ans  
 De constructions neuves Oui  Non  NSP  \_\_\_ ans  
 Autres types (à préciser) ..... Oui  Non  NSP  \_\_\_ ans

### 3. Avez-vous exercé une activité dans les travaux publics ou le génie civil ?

• Avez-vous été exposé à des poussières lors de vos activités? (Sol, gravier, sable, ciment, béton, fibrociment type Eternit ...)  
 Oui  Non  NSP  (préciser) ..... Oui  Non  NSP  \_\_\_ ans

• Avez-vous été exposé à du goudron/asphalte/bitume lors de vos activités ?

Oui  Non  NSP  (préciser) ..... Oui  Non  NSP  \_\_\_ ans

### 4. Avez-vous exercé des travaux de démolition ?

• Avez-vous été exposé à des poussières lors de ces activités de démolition (Pierre, carrelage, marbre, ciment, béton, fibrociment, briques réfractaires ou non réfractaires, ...)?

Oui  Non  NSP  (préciser) ..... Oui  Non  NSP  \_\_\_ ans

• Avez-vous été exposé à des poussières métalliques (découpe de charpentes métalliques par ex) lors de vos activités ?

Oui  Non  NSP  (préciser) ..... Oui  Non  NSP  \_\_\_ ans

### 5. Avez-vous exercé des travaux de maçonnerie et carrelage ?

• Avez-vous été exposé lors de vos activités de meulage/découpage/ ponçage à des poussières (Pierre, carrelage, marbre, ciment, béton, fibrociment, briques réfractaires ou non réfractaires, ...)?

Oui  Non  NSP  (préciser) ..... Oui  Non  NSP  \_\_\_ ans

• Avez-vous nettoyé ou décapé des surfaces (à la brosse métallique, par sablage, à la torche/chaumeau, par des acides ...)?

Oui  Non  NSP  (préciser) ..... Oui  Non  NSP  \_\_\_ ans

• Avez-vous utilisé des huiles de décoffrage (au pinceau, par pulvérisation, ...)?

Oui  Non  NSP  (préciser) ..... Oui  Non  NSP  \_\_\_ ans

• Avez-vous réalisé des coffrages en bois?

Oui  Non  NSP  (préciser) ..... Si oui, remplir la fiche « Bois »

### 6. Avez-vous exercé des travaux d'étanchéité ?

• Quels types de produits d'étanchéité utilisiez-vous?

Produits noirs bitumineux liquides et chauds  Bandes d'asphalte (carton, aluminium, feutre, kraft)  Feuilles de plomb   
 (préciser).....

• Utilisiez-vous un chalumeau pour chauffer les produits d'étanchéité ?

Oui  Non  NSP  (préciser) ..... Oui  Non  NSP  \_\_\_ ans

### 7. Avez-vous exercé des travaux de couverture-toiture ?

- Faisiez-vous de la construction  ou de la rénovation  ? Oui  Non  NSP
- (préciser)..... — \_\_\_\_\_ ans
- Quels types de matériaux avez-vous découpé/poncé/meulé ?
  - Oui  Non  NSP  (préciser)..... — \_\_\_\_\_ ans
  - Tuiles traditionnelles en argile  Ardoise  Matériaux en amiante  Matériaux en plastique de type ondulte  PVC
  - Plomb  Cuivre  Zinc  Acier galvanisé  Feuilles asphaltées
- Avez-vous utilisé des colles ou adhésifs (néoprène, polyuréthane, ...) ?
  - Oui  Non  NSP  (préciser)..... — \_\_\_\_\_ ans

### 8. Avez-vous exercé des travaux d'électricité ?

- Avez-vous percé des trous dans les surfaces comme des murs/cloisons en béton, faux plafonds, gaines techniques, surfaces floquées ?
  - Oui  Non  NSP  (préciser)..... — \_\_\_\_\_ ans
  - Etiez-vous intervenu sur du matériel électrique isolé à l'amiante (gaines de câbles tressées, armoltes électriques, résistances...) ?
    - Oui  Non  NSP  (préciser)..... — \_\_\_\_\_ ans

### 9. Avez-vous posé des revêtements de sol (moquettes, sols plastiques, parquets en bois, parquets stratifiés, dalles vinyle amiante, résines, ...)?

- Avez-vous exécuté au moins une des tâches suivantes ?
  - Oui  Non  NSP  (préciser)..... — \_\_\_\_\_ ans
  - Couler des chapes de béton, poser d'enduit de ragréage, poncer du béton, sabler des surfaces, poncer des parquets en bois, ...
    - Oui  Non  NSP  (préciser)..... — \_\_\_\_\_ ans
  - Avez-vous utilisé des colles ou adhésifs (vinylique, acrylique, époxydique, polyuréthane, néoprène, ...)?
    - Oui  Non  NSP  (préciser)..... — \_\_\_\_\_ ans

- Avez-vous utilisé des solvants organiques (par ex : pour décoller des revêtements de sol, dilution de colles) ?
  - Oui  Non  NSP  (préciser)..... — \_\_\_\_\_ ans

### 10. Avez-vous effectué des travaux d'isolation phonique et thermique ?

- Etiez-vous intervenu pour installer et/ou rénover des gaines techniques, plafonds, faux-plafonds, cloisons, murs et/ou toitures comportant les types d'isolants comme la laine de verre, de roche/laitier, polystyrène, amiante, mousses polyuréthane, carton, placcoplatre ?
  - Oui  Non  NSP  (préciser)..... — \_\_\_\_\_ ans

### 11. Avez-vous effectué des travaux de peinture ?

- Quel type de matériel avez-vous utilisé ?
  - Pinceaux/rouleaux  Compresseur/pistolet  Au trempé  (préciser)..... — \_\_\_\_\_ ans
- Quel type de peinture/vernis avez-vous utilisé ?
  - A l'eau  Aux solvants  A l'huile de lin  Antirouille  A l'amiante  Vernis  Vitrifacteur  Lasures
  - Glycérophthalique  Acrylique  Cellulosique  Polyuréthane  Epoxydique  (préciser)..... — \_\_\_\_\_ ans
- Avez-vous nettoyé ou décapé des surfaces avant de peindre ?
  - Oui  Non  NSP  (préciser)..... — \_\_\_\_\_ ans
- Avez-vous utilisé des diluants/solvants/dégraissants (white spirit, trichloréthylène, essence, chlorure de méthylène ...) ?
  - Oui  Non  NSP  (préciser)..... — \_\_\_\_\_ ans
- Utilisiez-vous un masque à cartouche ?
  - Oui  Non  NSP  (préciser)..... — \_\_\_\_\_ ans

### 12. Avez-vous effectué des travaux de plomberie-tuyauterie-chauffage ?

Oui  Non  NSP

- Quels types de matériaux avez-vous démolli/coupé/poncé/meulé? Oui  Non  NSP 
  - Isolants sous le toit ou faux-plafonds  Plafonds ou murs floqués
  - Canalisation en fibrociment  Dalles de sol  Foyers de cheminées/fours/chaudières
  - Autres (préciser).....
- Avez-vous utilisé les matériaux suivants? Oui  Non  NSP 
  - Fonte  Acier doux  Inox  Cuivre  Laiton  Bronze
  - Métaux galvanisés  plomb  PVC  fibrociment
  - Autres (préciser).....
- Avez-vous effectué de l'entretien de chaudières et/ou de chauffe-eau (au gaz, au fuel, au charbon, électrique, ...)?
  - Oui  Non  NSP  (préciser).....
- Avez-vous utilisé/rectifié des joints (carton, filasse, caoutchouc/plastique, amiante, ...)?
  - Oui  Non  NSP  (préciser).....
- Avez-vous utilisé les produits suivants?
  - White spirit  Trichloréthylène  Essence  Acide (décapage/détartrage...)
  - Oui  Non  NSP  (préciser).....
- Avez-vous effectué des travaux de soudure ? Oui  Non  NSP  **Si oui, remplir la fiche « Soudure »**

### 13. Commentaires libres

## CIMENTERIE

N° \_\_\_\_ Emploi De \_\_\_\_ à \_\_\_\_  
 N° \_\_\_\_ Emploi De \_\_\_\_ à \_\_\_\_  
 N° \_\_\_\_ Emploi De \_\_\_\_ à \_\_\_\_  
 N° \_\_\_\_ Emploi De \_\_\_\_ à \_\_\_\_

\* Estimation de la fréquence : 1 = Sporadique < 2 h/seem ; 2 = Discontinu 2 à 20 h/seem ; 3 = Continu > 20 h/seem  
 Fréquence\* Durée cumulée Présent dans une cabine/salle de contrôle

### 1. Quel poste occupez-vous ?

- Ouvrier de fabrication (rondier) Oui  Non  \_\_\_\_ ans Oui  Non

- Contremaître Oui  Non  \_\_\_\_ ans Oui  Non

- Agent d'entretien

- Entretien Mécanique Oui  Non  \_\_\_\_ ans Oui  Non

- Entretien Electrique Oui  Non  \_\_\_\_ ans Oui  Non

- Dépoussiérage de l'usine Oui  Non  \_\_\_\_ ans Oui  Non

- Système de dépoussiérage (filtre) Oui  Non  \_\_\_\_ ans Oui  Non

- Ouvrier à la cour « Manipulation des matières premières» Oui  Non  \_\_\_\_ ans Oui  Non

- Ouvrier d'expédition

- à l'ensachage Oui  Non  \_\_\_\_ ans Oui  Non

- bateaux Oui  Non  \_\_\_\_ ans Oui  Non

- silos Oui  Non  \_\_\_\_ ans Oui  Non

### 2. Avez-vous effectué d'autre(s) tâche(s) ?

Si oui, lesquelles ? \_\_\_\_\_

### 3. Commentaires libres



## FONDERIE

N° \_\_\_ Emploi De \_\_\_ à \_\_\_  
 N° \_\_\_ Emploi De \_\_\_ à \_\_\_  
 N° \_\_\_ Emploi De \_\_\_ à \_\_\_  
 N° \_\_\_ Emploi De \_\_\_ à \_\_\_

\* Estimation de la fréquence : 1 = Sporadique < 2 h/semaine ; 2 = Discontinue 2 à 20 h/semaine ; 3 = Continue > 20 h/semaine

## 1. Avez-vous effectué, vous-même, les tâches suivantes :

|                                                         |                                                         |                                  | Fréquence*                                    | Durée cumulée                    |
|---------------------------------------------------------|---------------------------------------------------------|----------------------------------|-----------------------------------------------|----------------------------------|
| 1.1. Préparation du sable de fonderie :                 | Oui                                                     | <input type="checkbox"/> Non     | <input type="checkbox"/>                      | ___ ans                          |
| 1.2. Moulage ou noyautage :                             | Oui                                                     | <input type="checkbox"/> Non     | <input type="checkbox"/>                      | ___ ans                          |
| Si oui, les moules ou les noyaux étaient-ils chauffés ? | Oui                                                     | <input type="checkbox"/> Non     | <input type="checkbox"/>                      |                                  |
| Avez-vous été en contact avec :                         | Sable (noir de carbone, brais) <input type="checkbox"/> |                                  | Acides <input type="checkbox"/>               | Résines <input type="checkbox"/> |
| 1.3. Chargement du four :                               | Oui                                                     | <input type="checkbox"/> Non     | <input type="checkbox"/>                      | Gasoil <input type="checkbox"/>  |
| Si oui, avec quels métaux ou produits :                 |                                                         |                                  |                                               |                                  |
| Mineral <input type="checkbox"/>                        | Charbon <input type="checkbox"/>                        | Coke <input type="checkbox"/>    | Ferrailles recyclées <input type="checkbox"/> |                                  |
| Chrome <input type="checkbox"/>                         | Fer <input type="checkbox"/>                            | Nickel <input type="checkbox"/>  | Cadmium <input type="checkbox"/>              |                                  |
| Fonte <input type="checkbox"/>                          | Acier <input type="checkbox"/>                          | Fondant <input type="checkbox"/> | Autre : _____                                 |                                  |
| 1.4. Coulage :                                          | Oui                                                     | <input type="checkbox"/> Non     | <input type="checkbox"/>                      | ___ ans                          |
| 1.5. Découpage :                                        | Oui                                                     | <input type="checkbox"/> Non     | <input type="checkbox"/>                      | ___ ans                          |
| Si oui, avec des huiles ? :                             | Oui                                                     | <input type="checkbox"/> Non     | <input type="checkbox"/>                      | ___ ans                          |

## 1.6. Ebarbage de finition (dessablage à air comprimé, meulage, sablage, granallage, oxycoupage) :

|                                                           |     |                              |                          |         |
|-----------------------------------------------------------|-----|------------------------------|--------------------------|---------|
| 1.7. Entretien du four :                                  | Oui | <input type="checkbox"/> Non | <input type="checkbox"/> | ___ ans |
| 1.8. Nettoyage par balayage/soufflet(s) (sols/machines) : | Oui | <input type="checkbox"/> Non | <input type="checkbox"/> | ___ ans |

## Selon vous, pensez-vous avoir travaillé à côté de fortes sources de chaleur (&gt; 300°C) ?

|                                           |     |                              |                          |         |
|-------------------------------------------|-----|------------------------------|--------------------------|---------|
| 2. Avez-vous effectué d'autres tâche(s) ? | Oui | <input type="checkbox"/> Non | <input type="checkbox"/> | ___ ans |
| Si oui, lesquelles ? _____                | Oui | <input type="checkbox"/> Non | <input type="checkbox"/> | ___ ans |

## 3. Commentaires libres :

## FUMÉES DIESEL

N° \_\_\_ Emploi De \_\_\_ à \_\_\_  
 N° \_\_\_ Emploi De \_\_\_ à \_\_\_  
 N° \_\_\_ Emploi De \_\_\_ à \_\_\_  
 N° \_\_\_ Emploi De \_\_\_ à \_\_\_

\* Estimation de la fréquence : 1 = Sporadique < 2 h/sem ; 2 = discontinue 2 à 20 h/sem ; 3 = continue > 20 h/sem

|                                                                        |       | Fréquence* |                                              | Durée cumulée |
|------------------------------------------------------------------------|-------|------------|----------------------------------------------|---------------|
| <b>1. Quel(s) poste(s) occupez-vous ?</b>                              |       |            |                                              |               |
| <b>1.1. Mécanicien sur véhicules à moteurs :</b>                       |       |            |                                              |               |
| Si oui, faisiez-vous de la réparation et/ou de l'entretien de :        |       |            |                                              |               |
| poils lourds :                                                         | oui   | non        | Si oui, nombre de poils lourds/semaine :     | ___ ans       |
| véhicules légers :                                                     | oui   | non        | Si oui, nombre de véhicules diesel/semaine : | ___ ans       |
| Dans le garage, y avait-il :                                           |       |            |                                              |               |
| Ventilation générale :                                                 | oui   | non        |                                              | ___ ans       |
| Aspirations branchées aux pots d'échappement lors des essais moteurs : | oui   | non        |                                              | ___ ans       |
| Travaux de contrôle sur bancs d'essais :                               | oui   | non        |                                              | ___ ans       |
| <b>1.2. Conducteur professionnel d'engins roulant au diesel :</b>      |       |            |                                              |               |
| Poids lourds                                                           | oui   | non        |                                              | ___ ans       |
| Transports en commun urbains (bus)                                     | oui   | non        |                                              | ___ ans       |
| Taxi                                                                   | oui   | non        |                                              | ___ ans       |
| Engins de chantier :                                                   | oui   | non        |                                              | ___ ans       |
| si oui, type(s) d'engins :                                             | ..... |            |                                              |               |
|                                                                        | ..... |            |                                              |               |
|                                                                        | ..... |            |                                              |               |
| Locomotive diesel                                                      | oui   | non        |                                              | ___ ans       |
| Autres (à préciser) :                                                  | oui   | non        |                                              | ___ ans       |
|                                                                        | ..... |            |                                              |               |
| <b>1.3. Contrôleur technique automobile :</b>                          |       |            |                                              |               |
| <b>1.4. Autres postes exposants :</b>                                  |       |            |                                              |               |
| Péagiste                                                               | oui   | non        |                                              | ___ ans       |
| Intervenant en parkings souterrains                                    | oui   | non        |                                              | ___ ans       |
| Livreur en 2 roues                                                     | oui   | non        |                                              | ___ ans       |
| Agent de la force publique                                             | oui   | non        |                                              | ___ ans       |
| Autres (à préciser) :                                                  | oui   | non        |                                              | ___ ans       |
|                                                                        | ..... |            |                                              |               |

## 2. Avez-vous effectué d'autre(s) tâche(s) ?

oui non \_\_\_ ans

Si oui, lesquelles ? .....

## 3. Commentaires libres

## TRAVAUX DES METAUX

N° \_\_\_\_ Emploi De \_\_\_\_ à \_\_\_\_  
 N° \_\_\_\_ Emploi De \_\_\_\_ à \_\_\_\_  
 N° \_\_\_\_ Emploi De \_\_\_\_ à \_\_\_\_  
 N° \_\_\_\_ Emploi De \_\_\_\_ à \_\_\_\_

\* Estimation de la fréquence : 1 = Sporadique < 2 h/sem ; 2 = Discontinue 2 à 20 h/sem ; 3 = Continue > 20 h/sem

Fréquence\* Durée cumulée

### 1. Avez-vous effectué, vous-même, les tâches suivantes :

#### 1.1. Fabrication, réparation ou affûtage des outils tranchants des machines-outils ?

Oui  Non  \_\_\_\_ ans

Oui  Non  \_\_\_\_ ans

Si oui, de quelle manière ? A sec  Avec des huiles entières  ou en émulsion

1.3. Dégraissage de pièces ? Oui  Non  \_\_\_\_ ans

Si oui, de quelle manière ? A chaud  A froid

1.4. Préparation de surfaces à décaper : Oui  Non  \_\_\_\_ ans

Si oui, avec quelle technique utilisée : Meulage manuel  Meulage mécanique

Sablage/Grenaillage  Acides  Solutions alcalines

1.5. Soudage ou oxycoupage des métaux (chalumeau ou arc) ? **Si oui (Remplir la fiche « Soudure »)**

Oui  Non  \_\_\_\_ ans

Oui  Non  \_\_\_\_ ans

1.7. Participation à la démetalisation chimique ? (décapage à l'acide via différents bains) :

Oui  Non  \_\_\_\_ ans

Oui  Non  \_\_\_\_ ans

1.8. Participation à la cémentation des métaux ?

Oui  Non  \_\_\_\_ ans

1.9. Participation aux opérations d'émaillage ?

Oui  Non  \_\_\_\_ ans

1.10. Participation aux opérations d'électrodeposition ? Oui  Non

1.11. Participation aux traitements thermiques des métaux ?

Oui  Non  \_\_\_\_ ans

Oui  Non  \_\_\_\_ ans

Si oui, par trempage : A l'huile  Aux polymères  Au plomb

1.12. Mise en peinture ou retouches des pièces après préparation ?

Oui  Non  \_\_\_\_ ans

Oui  Non  \_\_\_\_ ans

Si oui, de quelle manière ? En cabine  Au pistolet

1.13. Participation à l'entretien des fours (furnisterie) ? Oui  Non  \_\_\_\_ ans

1.14. Entretien des bains de traitement ? Oui  Non  \_\_\_\_ ans

2. Avez-vous effectué d'autre(s) tâche(s) ? Oui  Non  \_\_\_\_ ans

Si oui, lesquelles ? .....

### 3. Commentaires libres

## MINES/CARRIERES

N° \_\_\_ Emploi De \_\_\_ à \_\_\_  
 N° \_\_\_ Emploi De \_\_\_ à \_\_\_  
 N° \_\_\_ Emploi De \_\_\_ à \_\_\_  
 N° \_\_\_ Emploi De \_\_\_ à \_\_\_

\*Estimation de la fréquence : 1 = Sporadique < 2 h/sem ; 2 = Discontinue 2 à 20 h/sem ; 3 = Continue > 20 h/sem

|                                                                                                                                                                                                 |        | Fréquence*  |           | Durée cumulée                                     |         |
|-------------------------------------------------------------------------------------------------------------------------------------------------------------------------------------------------|--------|-------------|-----------|---------------------------------------------------|---------|
| 1. Dans quel type de mines ou de carrières avez-vous travaillé ?                                                                                                                                |        | Mines       | Carrières |                                                   |         |
| A ciel ouvert (au jour)                                                                                                                                                                         |        | ___         | ___       | ___                                               | ___ ans |
| Au fond                                                                                                                                                                                         |        | ___         | ___       | ___                                               | ___ ans |
| 2. Quel était le matériau extrait ?                                                                                                                                                             |        |             |           |                                                   |         |
| Fer                                                                                                                                                                                             | Nickel | Plomb       | Cuivre    | Amiante                                           | Charbon |
| Granit                                                                                                                                                                                          | Marbre | Argile      | Sable     | Autre (à préciser) :                              | _____   |
| 3. Avez-vous effectué les tâches suivantes (vous-même):                                                                                                                                         |        |             |           |                                                   |         |
| 1.1. Convoyage, concassage, broyage au jour :                                                                                                                                                   |        | Oui         | Non       | ___                                               | ___ ans |
| 1.2. Soutènement des galeries :                                                                                                                                                                 |        | Oui         | Non       | ___                                               | ___ ans |
| Si oui, avec quelle technique : bois (application de résines, projections, rien en particulier)<br>hydraulique                                                                                  |        |             |           |                                                   |         |
| 1.3. Tracage des galeries :                                                                                                                                                                     |        | Oui         | Non       | ___                                               | ___ ans |
| Si oui, de quelle manière : avec explosifs (nitrate-fuel ou « ANFO »)<br>manuel                                                                                                                 |        |             |           |                                                   |         |
| 1.4. Exploitation des galeries :                                                                                                                                                                |        | Oui         | Non       | ___                                               | ___ ans |
| Si oui, de quelle manière : manuel<br>avec engins, <b>Si oui, remplir fiche « Fumées de Diesel »</b>                                                                                            |        |             |           |                                                   |         |
| 1.5. Maintenance du matériel au fond :                                                                                                                                                          |        | Oui         | Non       | ___                                               | ___ ans |
| Si oui, quel(s) type(s) de matériel(s) : wagons<br>engins (graissage/dégraissage, mécanique, freins/embrayage), <b>Si oui, remplir fiche « Fumées de Diesel »</b><br>cages ascenseurs et câbles |        |             |           |                                                   |         |
| Avez-vous utilisé du trichloréthylène ?                                                                                                                                                         |        | Oui         | Non       | ___                                               | ___ ans |
| Avez-vous effectué du soudage ?                                                                                                                                                                 |        | Oui         | Non       | ___                                               | ___ ans |
| 4. Dans votre mine/carrière, y avait-t-il un arrosage du minéral/matériau extrait lors des travaux poussiéreux (pulvérisation, forage à injection d'eau, arrosage des convoyeurs, etc.) ?       |        |             |           |                                                   |         |
| Oui                                                                                                                                                                                             | Non    | Ne sait pas |           | Si oui, lequel : _____                            |         |
| 5. Avez-vous travaillé à côté de machines à moteur diesel ?                                                                                                                                     |        |             |           |                                                   |         |
| Oui                                                                                                                                                                                             | Non    | Ne sait pas |           | <b>Si oui, remplir fiche « Fumées de Diesel »</b> |         |
| 6. Avez-vous travaillé à côté de personnes utilisant des explosifs ?                                                                                                                            |        |             |           |                                                   |         |
| Oui                                                                                                                                                                                             | Non    | Ne sait pas |           | _____                                             |         |
| Si oui, quels types : Nitrate-fuel<br>« ANFO » Autre (à préciser) : _____                                                                                                                       |        |             |           |                                                   |         |
| 7. Avez-vous effectué d'autre(s) tâche(s) ?                                                                                                                                                     |        |             |           |                                                   |         |
| Oui                                                                                                                                                                                             | Non    | Oui         | Non       | ___                                               | ___ ans |
| Si oui, lesquelles ? _____                                                                                                                                                                      |        |             |           |                                                   |         |
| 8. Commentaires libres _____                                                                                                                                                                    |        |             |           |                                                   |         |

## Production laitière

(exploitant ou salarié, y compris aide familial bénévole dans l'enfance ou en période de retraite)

N° \_\_\_ Emploi De \_\_\_ à \_\_\_  
 N° \_\_\_ Emploi De \_\_\_ à \_\_\_  
 N° \_\_\_ Emploi De \_\_\_ à \_\_\_  
 N° \_\_\_ Emploi De \_\_\_ à \_\_\_

\* Estimation de la fréquence : 1 = Sporadique < 2 h/sem ; 2 = Discontinu 2 à 20 h/sem ; 3 = Continu > 20 h/sem

### 1. Travaux effectués personnellement

| Poste(s) occupé(s)                                         | Activité                                                  |                                                                           | Période (début/fin)<br>(en années) | Fréquence * | Durée cumulée<br>(ans) |
|------------------------------------------------------------|-----------------------------------------------------------|---------------------------------------------------------------------------|------------------------------------|-------------|------------------------|
|                                                            | <input type="checkbox"/> oui <input type="checkbox"/> non | actuelle <input type="checkbox"/><br>interrompue <input type="checkbox"/> |                                    |             |                        |
| Traite en étable                                           | <input type="checkbox"/> oui <input type="checkbox"/> non | actuelle <input type="checkbox"/><br>interrompue <input type="checkbox"/> | ___/___/___                        | ___ %       | ___                    |
| Traite en salle de traite                                  | <input type="checkbox"/> oui <input type="checkbox"/> non | actuelle <input type="checkbox"/><br>interrompue <input type="checkbox"/> | ___/___/___                        | ___ %       | ___                    |
| Affouragement manuel                                       | <input type="checkbox"/> oui <input type="checkbox"/> non | actuelle <input type="checkbox"/><br>interrompue <input type="checkbox"/> | ___/___/___                        | ___ %       | ___                    |
| Affouragement mécanisé                                     | <input type="checkbox"/> oui <input type="checkbox"/> non | actuelle <input type="checkbox"/><br>interrompue <input type="checkbox"/> | ___/___/___                        | ___ %       | ___                    |
| Renouvellement de la litière des animaux manuel            | <input type="checkbox"/> oui <input type="checkbox"/> non | actuelle <input type="checkbox"/><br>interrompue <input type="checkbox"/> | ___/___/___                        | ___ %       | ___                    |
| Renouvellement de la litière des animaux mécanisé          | <input type="checkbox"/> oui <input type="checkbox"/> non | actuelle <input type="checkbox"/><br>interrompue <input type="checkbox"/> | ___/___/___                        | ___ %       | ___                    |
| Préparation et distribution des compléments d'alimentation | <input type="checkbox"/> oui <input type="checkbox"/> non | actuelle <input type="checkbox"/><br>interrompue <input type="checkbox"/> | ___/___/___                        | ___ %       | ___                    |

**2. Hivernage : Durée annuelle moyenne : \_\_\_ mois Temps passé dans les bâtiments agricoles ? \_\_\_ H/jour**

### 3. Caractéristiques de l'exploitation

- Le bâtiment d'habitation est (était) t-il séparé des bâtiments de l'exploitation ?  
Si oui, à partir de quelle année : \_\_\_ Distance séparant les bâtiments : \_\_\_ en mètres oui  non
- Disposez-vous des équipements ou aménagements suivants :
  - Stabulation libre : oui  non  depuis l'année: \_\_\_
  - Griffe de chargement : oui  non  depuis l'année: \_\_\_
  - Pailleuse : oui  non  depuis l'année: \_\_\_
  - Salle de traite : oui  non  depuis l'année: \_\_\_
  - Séchage artificiel du fourrage en grange : oui  non  depuis l'année: \_\_\_
  - Ventilation électrique de la grange : oui  non  depuis l'année: \_\_\_
  - Ventilation électrique de l'étable : oui  non  depuis l'année: \_\_\_
- Mode de conditionnement des fourrages :
  - Fourrage stocké en vrac : oui  non  Période: \_\_\_/\_\_\_
  - Balles de moyenne densité : oui  non  Période: \_\_\_/\_\_\_
  - Grosses balles de haute densité (rondes/rectangulaires) : oui  non  Période: \_\_\_/\_\_\_

### 4. Avez-vous effectué d'autres tâches ?

Si oui, lesquelles ? ..... Oui  Non  H/Sem \_\_\_ ans

### 5. Commentaires libres

## SIDERURGIE

N° \_\_\_ Emploi De \_\_\_ à \_\_\_  
 N° \_\_\_ Emploi De \_\_\_ à \_\_\_  
 N° \_\_\_ Emploi De \_\_\_ à \_\_\_  
 N° \_\_\_ Emploi De \_\_\_ à \_\_\_

\* Estimation de la fréquence : 1 = Sporadique < 2 h/sem ; 2 = Discontinue 2 à 20 h/sem ; 3 = Continue > 20 h/sem

Fréquence\* Durée cumulée

### 1. Avez-vous effectué, vous-même, les tâches suivantes :

#### 1.1. Chargement ou déchargement des matières premières suivantes (normis en extérieur) ?

Oui  Non  \_\_\_ ans  
 Ferrailles recyclées   
 Autre (à préciser) : .....  
 \_\_\_ ans

Si oui, avec quels métaux ou produits :

Minerai  Charbon  Coke  Chrome  Ferrailles recyclées   
 Nickel  Cadmium  Fonte  Fondant  Autre (à préciser) : .....  
 \_\_\_ ans

#### 1.2. Préparation du minerai, du coke ou du charbon : (ex : concassage, criblage, etc...)

Oui  Non  \_\_\_ ans  
 Oui  Non  \_\_\_ ans

#### 1.3. Enfournement / défournement du coke :

Oui  Non  \_\_\_ ans  
 Oui  Non  \_\_\_ ans

#### 1.4. Chargement du four des hauts-fourneaux

Si oui, avec quels métaux ou produits :

Minerai  Charbon  Coke  Chrome  Ferrailles recyclées   
 Nickel  Cadmium  Fonte  Fondant  Autre (à préciser) : .....  
 \_\_\_ ans

#### 1.5. Coulée de fonte ou d'acier :

Oui  Non  \_\_\_ ans  
 Oui  Non  \_\_\_ ans

#### 1.6. Bouchage ou débouchage des trous de coulée :

Oui  Non  \_\_\_ ans  
 Oui  Non  \_\_\_ ans

#### 1.7. Entretien / réparation des rigoles de coulée :

Oui  Non  \_\_\_ ans  
 Oui  Non  \_\_\_ ans

#### 1.8. Entretien des fours :

Oui  Non  \_\_\_ ans  
 Oui  Non  \_\_\_ ans

#### 1.9. Traitement thermique de surface ::

Oui  Non  \_\_\_ ans  
 Oui  Non  \_\_\_ ans

(ex : cémentation, trempe huile etc.)

#### 1.10. Laminage ou étréage à chaud :

Oui  Non  \_\_\_ ans  
 Oui  Non  \_\_\_ ans

#### 1.11. Oxycoupage ou décorticage :

Oui  Non  \_\_\_ ans  
 Oui  Non  \_\_\_ ans

#### 1.12. Maintenance des machines de production :

Oui  Non  \_\_\_ ans  
 Si oui : en atelier  H/jour \_\_\_ et/ou dans l'usine  H/jour \_\_\_

Avez-vous effectué :

Du soudage (chalumeau, arc, polissoir) Oui  Non  Ne sait pas  si oui remplir fiche « Soudure »  
 De l'usinage (à sec, avec des huiles) Oui  Non  Ne sait pas  si oui remplir fiche « Métaux »

### 2. Pensez-vous avoir travaillé à côté de fortes sources de chaleur (> 300°C) ?

Oui  Non  \_\_\_ ans

### 3. Avez-vous effectué d'autre(s) tâche(s) ?

Oui  Non  \_\_\_ ans

Si oui, lesquelles ? .....

### 4. Commentaires libres

**SOUDEURE/ BRASURE**

N° \_\_\_ Emploi De \_\_\_ à \_\_\_  
 N° \_\_\_ Emploi De \_\_\_ à \_\_\_  
 N° \_\_\_ Emploi De \_\_\_ à \_\_\_  
 N° \_\_\_ Emploi De \_\_\_ à \_\_\_

\* Estimation de la fréquence : 1 = Sporadique < 2 h/sem ; 2 = Discontinue 2 à 20 h/sem ; 3 = Continue > 20 h/sem

Fréquence\*    Durée cumulée  
 \_\_\_\_\_ H/jour

**1. Durée quotidienne de l'activité de soudure/brasure : \_\_\_\_\_ H/jour****2. Quel(s) type(s) de métaux soudez-vous ?**

Acier doux    Oui  Non  Ne sait pas  \_\_\_\_\_ ans  
 Acier galvanisé    Oui  Non  Ne sait pas  \_\_\_\_\_ ans  
 Aluminium    Oui  Non  Ne sait pas  \_\_\_\_\_ ans  
 Béryllium    Oui  Non  Ne sait pas  \_\_\_\_\_ ans  
 Cuivre    Oui  Non  Ne sait pas  \_\_\_\_\_ ans  
 Fer    Oui  Non  Ne sait pas  \_\_\_\_\_ ans  
 Fonte    Oui  Non  Ne sait pas  \_\_\_\_\_ ans  
 Inox    Oui  Non  Ne sait pas  \_\_\_\_\_ ans  
 Plomb    Oui  Non  Ne sait pas  \_\_\_\_\_ ans  
 Autre (à préciser) : \_\_\_\_\_ ans

**3. Avant de souder, faisissez-vous une préparation des pièces métalliques à souder ?**

par sablage     par grenailage     par meulage      
 par bains d'acide     par bain de solvant     Autre (à préciser)   

**4. Quel(s) type(s) de soudure ou de brasure faisissez-vous ?**

**4.1. Soudure à l'arc**    Oui  Non  Ne sait pas  \_\_\_\_\_ ans

Si oui 4.1., quel(s) type(s) de gaz utilisez-vous ?

TIG    Oui  Non  Ne sait pas  \_\_\_\_\_ ans  
 MIG    Oui  Non  Ne sait pas  \_\_\_\_\_ ans  
 MAG    Oui  Non  Ne sait pas  \_\_\_\_\_ ans  
 Plasma    Oui  Non  Ne sait pas  \_\_\_\_\_ ans  
 Autre (à préciser) : \_\_\_\_\_ ans

Si oui 4.1., quel(s) type(s) de baguettes à souder utilisez-vous ?

Rutile    Oui  Non  Ne sait pas  \_\_\_\_\_ ans  
 Basique    Oui  Non  Ne sait pas  \_\_\_\_\_ ans  
 Autre (à préciser) : \_\_\_\_\_ ans

**4.2. Brasage tendre**

Au fer à souder    Oui  Non  Ne sait pas  \_\_\_\_\_ ans  
 A la vague    Oui  Non  Ne sait pas  \_\_\_\_\_ ans  
 Autre (à préciser) : \_\_\_\_\_ ans

**4.3. Soudure électrique**

par point/par pression    Oui  Non  Ne sait pas  \_\_\_\_\_ ans  
 Autre (à préciser) : \_\_\_\_\_ ans

**4.4. Brasage fort** Oui  Non  Ne sait pas  \_\_\_ ans

**4.5. Soudure au chalumeau** Oui  Non  Ne sait pas  \_\_\_ ans

Si oui, à 4.4. et 4.5. :

**Quel type de gaz utilisiez-vous ?**

Oxyacétylène Oui  Non  Ne sait pas  \_\_\_ ans

Propane Oui  Non  Ne sait pas  \_\_\_ ans

butane (gaz de ville) Oui  Non  Ne sait pas  \_\_\_ ans

Autre (à préciser)  ..... \_\_\_ ans

**Quel type de baguettes à souder utilisiez-vous ?**

au plomb Oui  Non  Ne sait pas  \_\_\_ ans

à l'argent Oui  Non  Ne sait pas  \_\_\_ ans

Autre (à préciser)  ..... \_\_\_ ans

**4.6. Autres types de soudure (à préciser) ?**  .....

**5. Commentaires libres** .....



## INDUSTRIE TEXTILE

N° \_\_\_\_ Emploi De \_\_\_\_ à \_\_\_\_  
 N° \_\_\_\_ Emploi De \_\_\_\_ à \_\_\_\_  
 N° \_\_\_\_ Emploi De \_\_\_\_ à \_\_\_\_  
 N° \_\_\_\_ Emploi De \_\_\_\_ à \_\_\_\_

\*Estimation de la fréquence : 1 = Sporadique < 2 h/sem ; 2 = Discontinue 2 à 20 h/sem ; 3 = Continue > 20 h/sem

Fréquence\* Durée cumulée  
 1. Dans que(s) secteur(s) avez-vous travaillé et à quel(s) poste(s) de travail avez-vous occupé ?

## 1.1. Secteurs d'activité :

1.1.1. Culture Oui  Non  \_\_\_\_\_ ans  
 Précisez le poste de travail : Arrachage  Ramassage  Egrenage   
 1.1.2. Atelier de teillage Oui  Non  \_\_\_\_\_ ans  
 Précisez : En début de chaîne (dérouleuse)  ou en fin de chaîne (mise en écheveaux de la filasse)   
 1.1.3. Atelier d'ouvrison Oui  Non  \_\_\_\_\_ ans  
 1.1.4. Atelier de battage Oui  Non  \_\_\_\_\_ ans  
 1.1.5. Atelier de cardage Oui  Non  \_\_\_\_\_ ans  
 1.1.6. Atelier de filage ou filature Oui  Non  \_\_\_\_\_ ans  
 1.1.7. Atelier d'étrépage/passage de banc à broches Oui  Non  \_\_\_\_\_ ans  
 1.1.8. Atelier de renvidage et bobinage Oui  Non  \_\_\_\_\_ ans  
 1.1.9. Atelier de teinture, impression, finissage Oui  Non  \_\_\_\_\_ ans  
 1.1.10. Atelier de tissage/ tricotage Oui  Non  \_\_\_\_\_ ans

## 1.2. Postes de travail :

1.2.1. Ouvreur de balles (déballage manuel /automatique ) Oui  Non  \_\_\_\_\_ ans  
 1.2.2. Batteur de fibres Oui  Non  \_\_\_\_\_ ans  
 1.2.3. Cardeur de fibres Oui  Non  \_\_\_\_\_ ans  
 1.2.4. Fileur Oui  Non  \_\_\_\_\_ ans  
 1.2.5. Bobineur Oui  Non  \_\_\_\_\_ ans  
 1.2.6. Régleur de métiers à tisser à tricoter Oui  Non  \_\_\_\_\_ ans  
 1.2.7. Nettoyeur et entretien de machines textiles Oui  Non  \_\_\_\_\_ ans  
 1.2.8. Agent de traitement des déchets textiles Oui  Non  \_\_\_\_\_ ans  
 1.2.9. Autre(s) poste(s) de travail : ..... Oui  Non  \_\_\_\_\_ ans

## 2. Quel(s) type(s) de fibre(s) textile avez-vous travaillé ?

- Coton Oui  Non  Ne sait pas  Activité(s) \_\_\_\_\_ Emploi(s) \_\_\_\_\_ ans  
 - Lin Oui  Non  Ne sait pas  Activité(s) \_\_\_\_\_ Emploi(s) \_\_\_\_\_ ans  
 - Chanvre Oui  Non  Ne sait pas  Activité(s) \_\_\_\_\_ Emploi(s) \_\_\_\_\_ ans  
 - Sisal Oui  Non  Ne sait pas  Activité(s) \_\_\_\_\_ Emploi(s) \_\_\_\_\_ ans  
 - Jute Oui  Non  Ne sait pas  Activité(s) \_\_\_\_\_ Emploi(s) \_\_\_\_\_ ans  
 - Laine Oui  Non  Ne sait pas  Activité(s) \_\_\_\_\_ Emploi(s) \_\_\_\_\_ ans  
 - Autres.....Oui  Non  Ne sait pas  Activité(s) \_\_\_\_\_ Emploi(s) \_\_\_\_\_ ans

## 3. Avez-vous effectué d'autre(s) tâche(s) ?

Si oui, lesquelles ? ..... Oui  Non  \_\_\_\_\_ ans

## 4. Commentaires libres
